# Supplementary material
Source: PubMed Central journal article supplement (PMC7993650)
Supplement: tp-105-861-s001.pdf [file tp-105-861-s001.pdf]

**Table S1:** Nationwide trends in number of transplantations, waiting list deaths, waiting list activations and donors between March 1 and May 31 from 2015 to 2020.

|                       | <b>2015</b> | <b>2016</b> | <b>2017</b> | <b>2018</b> | <b>2019</b> | <b>2020</b> |
|-----------------------|-------------|-------------|-------------|-------------|-------------|-------------|
| Number of Transplants | 512         | 630         | 631         | 660         | 690         | 562         |
| Number of Deaths      | 103         | 81          | 90          | 103         | 94          | 81          |
| Number of Activations | 612         | 711         | 800         | 837         | 835         | 555         |
| Number of Donors      | 481         | 586         | 591         | 619         | 646         | 530         |

**Table S2.** Nationwide trends in number of transplantations, waiting list deaths, waiting list activations and donors in the month of April from 2015-2020

|                       | <b>April<br/>2015</b> | <b>April<br/>2016</b> | <b>April<br/>2017</b> | <b>April<br/>2018</b> | <b>April<br/>2019</b> | <b>April<br/>2020</b> |
|-----------------------|-----------------------|-----------------------|-----------------------|-----------------------|-----------------------|-----------------------|
| Number of Transplants | 153                   | 197                   | 193                   | 196                   | 202                   | 151                   |
| Number of Deaths      | 27                    | 18                    | 18                    | 30                    | 27                    | 34                    |
| Number of Activations | 189                   | 229                   | 251                   | 273                   | 260                   | 157                   |
